# Supplementary material
Source: PubMed Central journal article supplement (PMC6625895)
Supplement: NIHMS1033550-supplement-Supplementary_Table_1.pdf [file NIHMS1033550-supplement-Supplementary_Table_1.pdf]

**Supplementary Table 1. Demographic characteristics of patients with functional neurological disorder.**

| FND Subject | Age | Gender | Educ. (years) | FND Subtype     | Symptom Description                                                                 | Current Psychiatric Diagnoses             | Past Psychiatric Diagnoses     | Psychotropic Medications |
|-------------|-----|--------|---------------|-----------------|-------------------------------------------------------------------------------------|-------------------------------------------|--------------------------------|--------------------------|
| 1           | 60  | M      | 18            | PNES, FW        | Episodes of behavioral arrest with altered consciousness, left arm and leg weakness | Anxiety NOS                               | MDD, LSD and Opiate Abuse      | GBP, MIR                 |
| 2           | 55  | F      | 12            | FMD, FW*        | Right arm tremor, right leg weakness                                                | MDD, PD_Ag+                               | MDD, Alcohol and Cocaine Abuse | SERT, TZD                |
| 3           | 55  | F      | 16            | FMD*            | Abnormal gait                                                                       | GAD, Undiff Somatoform                    | -                              | ZLP, ECP, GBP            |
| 4           | 36  | F      | 12            | FMD, FW         | Right arm tremor, left facial weakness                                              | Dysthymia, PD_Ag-, GAD, Undiff Somatoform | MDD                            | DLX, TZD                 |
| 5           | 42  | F      | 18            | FW*             | Right hand weakness                                                                 | MDD, PD_Ag-, GAD, Somatoform Pain         | Opiate Abuse                   | CLP, DVX                 |
| 6           | 44  | F      | 18            | FMD             | Abnormal gait                                                                       | -                                         | Eating Disorder NOS            | DLX                      |
| 7           | 31  | F      | 15            | FW <sup>†</sup> | Right arm and leg weakness                                                          | PTSD, OCD, Ag                             | MDD                            | -                        |
| 8           | 51  | F      | 14            | FMD*            | Head and four limb tremor, neck dystonia                                            | -                                         | MDD                            | -                        |
| 9           | 49  | F      | 14            | FMD, FW*        | Left facial weakness, head tremor, abnormal gait                                    | MDD, Undiff Somatoform                    | PTSD                           | DOX                      |

|    |    |   |    |                          |                                                                    |                                                    |                                                     |                       |
|----|----|---|----|--------------------------|--------------------------------------------------------------------|----------------------------------------------------|-----------------------------------------------------|-----------------------|
| 10 | 26 | F | 16 | FMD,<br>PNES*            | Head and bilateral<br>arm tremor, abnormal<br>gait, motor seizures | MDD, PD_Ag+, GAD,<br>Undiff Somatoform             | -                                                   | CLP, VEN              |
| 11 | 23 | F | 18 | PNES,<br>FW <sup>†</sup> | Right arm weakness,<br>atonic seizures                             | Depression NOS,<br>Social Phobia, Alcohol<br>Abuse | -                                                   | -                     |
| 12 | 22 | M | 14 | FW <sup>†</sup>          | Left arm and leg<br>weakness                                       | Depression NOS,<br>PD_Ag-                          | -                                                   | -                     |
| 13 | 27 | F | 18 | PNES                     | Motor seizures                                                     | PD_Ag+                                             | MDD                                                 | CLN                   |
| 14 | 38 | F | 10 | FMD <sup>†</sup>         | Paroxysmal<br>abnormal truncal and<br>head movements               | Undiff Somatoform                                  | -                                                   | -                     |
| 15 | 42 | F | 18 | FMD                      | Right arm and head<br>tremor, dystonia<br>(bilateral feet)         | Somatoform Pain<br>Disorder                        | MDD                                                 | SERT, DZP,<br>GBP     |
| 16 | 49 | M | 13 | FW* <sup>†</sup>         | Right wrist weakness                                               | PD_Ag-, GAD                                        | MDD                                                 | FLX, GBP,<br>DXAM/APM |
| 17 | 50 | F | 14 | FMD,<br>PNES             | Head and bilateral<br>arm tremor, motor<br>seizures                | MDD, PD_Ag+,<br>PTSD, GAD, Eating<br>Disorder NOS  | Alcohol, Cocaine,<br>Opiate and Stimulants<br>Abuse | FLX, ZLP, LRZ         |
| 18 | 31 | M | 14 | PNES                     | Episodes of<br>behavioral arrest with<br>altered<br>consciousness  | PD_Ag-, PTSD                                       | MDD, Alcohol Abuse                                  | DLX, NRT, PZN         |
| 19 | 39 | F | 16 | FW* <sup>†</sup>         | Four limb weakness                                                 | PTSD, GAD,<br>Somatization Disorder                | MDD                                                 | CLN                   |

|    |    |   |    |                    |                                                          |                                               |                              |                    |
|----|----|---|----|--------------------|----------------------------------------------------------|-----------------------------------------------|------------------------------|--------------------|
| 20 | 57 | F | 18 | PNES               | Motor seizures with fear and crying                      | Ag                                            | MDD, Alcohol Abuse           | TZD, GBP, CTP, TPM |
| 21 | 53 | F | 16 | FMD                | Abnormal gait                                            | MDD, Dysthymia, GAD, Somatoform Pain Disorder | Eating Disorder NOS          | GBP, TZD, DLX      |
| 22 | 29 | F | 18 | PNES <sup>†</sup>  | Motor seizures w/ altered consciousness                  | GAD, Specific Phobia                          | Eating Disorder NOS          | TPM                |
| 23 | 37 | F | 18 | PNES, FMD          | Motor seizures w/ LOC, left arm tremor                   | PD_Ag-, Undiff Somatoform                     | PTSD, Social Phobia          | -                  |
| 24 | 57 | F | 12 | PNES               | Motor seizures w/ LOC                                    | MDD, Dysthymia, PTSD                          | Social Phobia                | BUP, LRZ, QTP, ZLP |
| 25 | 20 | F | 14 | FMD, FW            | Abnormal gait, right arm tremor and weakness             | PD_Ag-                                        | MDD                          | -                  |
| 26 | 51 | M | 19 | PNES <sup>++</sup> | Sensory symptoms and loss of time                        | -                                             | MDD, Anxiety NOS             | DNZ                |
| 27 | 19 | M | 14 | FMD                | Jerking head and limb movements                          | Anxiety NOS                                   | -                            | -                  |
| 28 | 48 | F | 12 | FMD                | Abnormal gait                                            | Anxiety NOS <sup>**</sup>                     | Depression NOS <sup>**</sup> | AMD, SERT, LRZ     |
| 29 | 20 | F | 12 | PNES               | Episodes of behavioral arrest with altered consciousness | Somatization Disorder, Anxiety NOS            | Depression NOS               | BSP, ECP, LRZ, TZD |

|    |    |   |    |                     |                                                                                                                    |                                       |   |          |
|----|----|---|----|---------------------|--------------------------------------------------------------------------------------------------------------------|---------------------------------------|---|----------|
| 30 | 29 | F | 18 | FMD,<br>FW,<br>PNES | Minor motor seizures<br>with altered<br>consciousness,<br>abnormal gait, left<br>arm and bilateral leg<br>weakness | Somatization Disorder,<br>Anxiety NOS | - | GBP, LRZ |
|----|----|---|----|---------------------|--------------------------------------------------------------------------------------------------------------------|---------------------------------------|---|----------|

†Indicates that these patients had splitting of the midline functional numbness. ††Indicates that patient also had a functional cognitive disorder. \*Indicates that these patients also had functional voice symptoms. \*\*Psychiatric diagnoses made by chart review, as structured psychiatric interview not performed. M, male; F, female; NES, Nonepileptic Seizures; FW, Functional Weakness; FMD, Functional Movement Disorders; NOS, not otherwise specified; MDD, Major Depressive Disorder; PD\_Ag+, Panic Disorder with Agoraphobia; PD\_Ag-, Panic Disorder without Agoraphobia; GAD, Generalized Anxiety Disorder; Undiff Somatoform, Undifferentiated Somatoform Disorder; PTSD, Post-Traumatic Stress Disorder; OCD, Obsessive Compulsive Disorder; Ag, Agoraphobia without Panic Disorder; LOC, Loss of Consciousness; AMD, Amantadine; APM, Amphetamine; APZ, Aripiprazole; ATP, Amitriptyline; BSP, Buspirone; BUP, Bupropion; BZP, Benzotropine; CLN, Clonidine; CLP, Clonazepam; CTP, Citalopram; CZP, Carbamazepine; DLX, Duloxetine; DNZ, donepezil; DOX, Doxepin; DVX, Desvenlafaxine; DXAM, Dextroamphetamine; DZP, Diazepam; ECP, Escitalopram; FLX, Fluoxetine; GBP, Gabapentin; LRZ, Lorazepam; LSD, Lysergic Acid Diethylamide; LTG, Lamotrigine; LXAM, Lisdexamfetamine; MIR, Mirtazapine; NRT, Nortriptyline; PGN, Pregabalin; PZN, Prazosin; QTP, Quetiapine; ROP, Ropinirole; SERT, Sertraline; THP, Trihexyphenidyl; TPM, Topiramate; TZD, Trazodone; VEN, Venlafaxine; VPA, Valproic Acid; VTX, Vortioxetine; ZLP, Zolpidem.
